# Supplementary material
Source: PubMed Central journal article supplement (PMC1446099)
Supplement: mbc_E05-08-0811_1.pdf [file mbc_E05-08-0811_1.pdf]

### Yeast strains used in this study

|        |                                                                                                   |                            |
|--------|---------------------------------------------------------------------------------------------------|----------------------------|
| SO5    | Mia1p-GFP:: <i>ura4+</i> <i>ura4D-18 leu1-32 ade6-M210 h-</i>                                     | SO collection              |
| SO76   | pREP1- $\alpha$ -tubulin-GFP/ <i>ura4D-18 leu1-32 ade6-M210 h-</i>                                | SO collection              |
| SO77   | pREP1- $\alpha$ -tubulin-GFP/ <i>mia1<math>\Delta</math>::ura4+ ura4D-18 leu1-32 ade6-M210 h-</i> | SO collection              |
| SO132  | pREP41-Mia1p-GFP/ <i>ura4D-18 leu1-32 ade6-M210 h-</i>                                            | This study                 |
| SO249  | Mto1p/Mbo1p-GFP:: <i>kanR ura4-D18 leu1-32 ade6-M2x h-</i> (KGY2434)                              | From K. Gould and J. Tasto |
| SO502  | pRep1 $\alpha$ -tubulin GFP Uch2-GFP:: <i>ura4 ura4-D18 leu1-32 ade6M2X</i>                       | This study                 |
| SO504  | pRep1 $\alpha$ -tubulin GFP Uch2-GFP:: <i>ura4 mia1<math>\Delta</math>::ura4</i>                  | This study                 |
| SO646  | Mto1p/Mbo1p-GFP:: <i>kanR mia1<math>\Delta</math>::ura4+</i>                                      | This study                 |
| SO1222 | Alp4p-GFP:: <i>ura4+ ura4D-18 leu1-32 ade6-M210 h-</i>                                            | This study                 |
| SO1248 | Alp4p-GFP:: <i>ura4+ mia1<math>\Delta</math>::ura4+ ura4-D18</i>                                  | This study                 |
| SO1287 | Rsp1p-GFP:: <i>kanR leu1-32 ura4-D18 ade6-M2x</i>                                                 | From F. Chang              |
| SO1387 | Rsp1p-GFP:: <i>kanR mia1<math>\Delta</math>::ura leu1-32 ura4-D18 ade6-M2x</i>                    | This study                 |
| SO1490 | Mto1-GFP:: <i>kanR mad2<math>\Delta</math>::ura4</i>                                              | This study                 |
| SO1491 | Mto1p/Mbo1p-GFP:: <i>kanR nda3-KM311 mad2<math>\Delta</math>::ura4</i>                            | This study                 |
| SO1618 | pRep1 $\alpha$ -tubulin GFP Sid2-GFP:: <i>ura4</i>                                                | This study                 |
| SO1620 | pRep1 $\alpha$ -tubulin GFP Sid2-GFP:: <i>ura mia1<math>\Delta</math>::ura4</i>                   | This study                 |
| SO1778 | Mto1p/Mbo1p-GFP:: <i>kanR alp14<math>\Delta</math>::ura4</i>                                      | This study                 |
| SO1795 | pRep1 $\alpha$ -tubulin GFP Sid2-GFP:: <i>ura4 alp14<math>\Delta</math>::ura4</i>                 | This study                 |
| SO1797 | Mto1p-GFP:: <i>KanR mal3<math>\Delta</math>::his3+</i>                                            | This study                 |
