# Supplementary material
Source: PubMed Central journal article supplement (PMC1446099)
Supplement: mbc_E05-08-0811_5.pdf [file mbc_E05-08-0811_5.pdf]

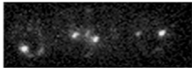

MBC added after the onset  
of the eMTOC disassembly

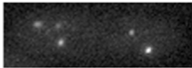

MBC added after the full  
disassembly of the eMTOC
